# Supplementary material for: Serendipitous isolation of a triazinone-based air stable organic radical: synthesis, crystal structure, and computation
Source: Royal Society of Chemistry journal article supplement (doi:10.1039/d0nj02028a), 2020-01-01
Supplement: d0nj02028a1.pdf [file d0nj02028a1.pdf]

## Supporting Information

### **Serendipitous isolation of triazinone based air stable organic radical: synthesis, crystal structure and computation**

Vedichi Madhu,<sup>\*</sup>, <sup>a, b</sup> Arun Kumar Kanakati,<sup>b</sup> Samar K. Das<sup>\*, b</sup>

<sup>a</sup>Department of Chemistry, Karunya Institute of Technology and Science, Coimbatore-641 114, Tamil Nadu, India. Tel: +91-422-261-4483;

\*E-mail: [madhu@karunya.edu](mailto:madhu@karunya.edu); [vmadhu1@gmail.com](mailto:vmadhu1@gmail.com)

<sup>b</sup>School of Chemistry, University of Hyderabad, Central University P.O., Hyderabad 500 046, Telangana, India, E-mail: [skdas@uohyd.ac.in](mailto:skdas@uohyd.ac.in), [samar439@gmail.com](mailto:samar439@gmail.com)

### **Table of Contents**

- 1. Experimental Section**
- 2. NMR studies**
- 3. Single crystal X-ray crystallographic analysis**
- 4. Computational Details**
- 5. References**

## 1. Experimental Section

### 1.1. Materials and methods

All the reactions were performed under ultrahigh pure nitrogen atmosphere unless mentioned elsewhere. All the deuterated NMR solvents were purchased from Acros Organics, and the other commercially procured chemicals were used as received. The NMR spectra were recorded by Bruker AV-400 400 MHz spectrometer using tetramethylsilane as internal standard in case of  $\text{CDCl}_3$  solvent. The electron spin resonance (ESR) spectra were recorded on a (JEOL) JESFA200 ESR spectrometer. The IR spectra (with KBr pellets) were recorded over the range  $400\text{--}4000\text{ cm}^{-1}$  with a JASCO FT/IT-5300 spectrometer. Elemental analysis was performed by FLASH EA series 1112 CHNS analyzer.

**Synthesis of  $[\text{1}^{2+}(\text{PF}_6)_2]^{2-}\cdot 2\text{H}_2\text{O} \equiv \text{1}(\text{PF}_6)_2\cdot 2\text{H}_2\text{O}$ :** Cyanuric chloride (100 mg, 0.54 mmol) was dissolved in dry  $\text{CH}_3\text{CN}$  (15 mL) in 25 mL round bottom flask. To this mixture were added 4,4'-bipyridine (250 mg, 1.67 mmol) and resulting reaction mixture was refluxed for 3 hrs with stirring at  $80^\circ\text{C}$  under dry  $\text{N}_2$  atmosphere and then cooled to room temperature. This afforded green colored precipitate, which was filtered off and dried in air. The resulting product was dissolved in water by slightly warming and the clear solution was filtered. To this filtrate,  $\text{NH}_4\text{PF}_6$  were added economically until the precipitation was completed. This product was filtered off, and dried in air. The yield 176 mg (81% based of 4,4'-bipyridine). IR (KBr pellet) ( $\nu/\text{cm}^{-1}$ ): 3657, 3400, 3130, 2557, 2146, 1631, 1570, 1496, 1444, 1391, 1337, 1207, 1163, 1033, 997, 837, 760, 652, 630, 557, 491.  $^1\text{H}$  NMR (400 MHz,  $\text{DMSO-}d_6$ ):  $^1\text{H}$  NMR (400 MHz,  $\text{DMSO-}d_6$ ):  $\delta$  7.85 (d,  $J = 7.2\text{ Hz}$ , 4H), 6.53 (br s, 4H), 6.31 (d,  $J = 6.8\text{ Hz}$ , 4H), 5.85 (d,  $J = 4.4\text{ Hz}$ , 4H).  $^{13}\text{C}$  NMR (400 MHz,  $\text{DMSO-}d_6$ ):  $\delta$  165.0, 163.4, 157.1, 149.5, 146.5, 141.9, 125.8, 123.8. Anal. Calcd for  $\text{C}_{23}\text{H}_{20}\text{F}_{12}\text{N}_7\text{O}_3\text{P}_2$ : C, 37.70; H, 2.75; N, 13.39. Found: C, 38.32; H, 2.98; N, 12.84.

**Synthesis of  $[\text{1}^+\text{PF}_6^- \equiv \text{1}\cdot\text{PF}_6]$ :** Cyanuric chloride (100 mg, 0.54 mmol) was dissolved in dry  $\text{CH}_3\text{CN}$  (15 mL) in 25 mL round bottom flask. To this mixture were added 4,4'-bipyridine (250 mg, 1.67 mmol) and resulting reaction mixture was refluxed for 48 hrs

with stirring at 80°C under dry N<sub>2</sub> atmosphere and then cooled to room temperature, affording pale green color precipitate, that was filtered off and dried in air. The resulting product was dissolved in water by slightly warming and the clear solution was obtained by its filtering. To this filtrate, NH<sub>4</sub>PF<sub>6</sub> were added economically until the precipitation was completed. This product was filtered off, and dried in air. The yield is 100 mg (32%). IR (KBr pellet) (v/cm<sup>-1</sup>): 3445, 3134, 3086, 3057, 1618, 1552, 1496, 1388, 1338, 1288, 1159, 810. Anal. Calcd for C<sub>23</sub>H<sub>16</sub>F<sub>6</sub>N<sub>7</sub>OP: C, 50.08; H, 2.93; N, 17.79. Found: C, 51.22; H, 2.71; N, 18.41.

## 2. NMR studies

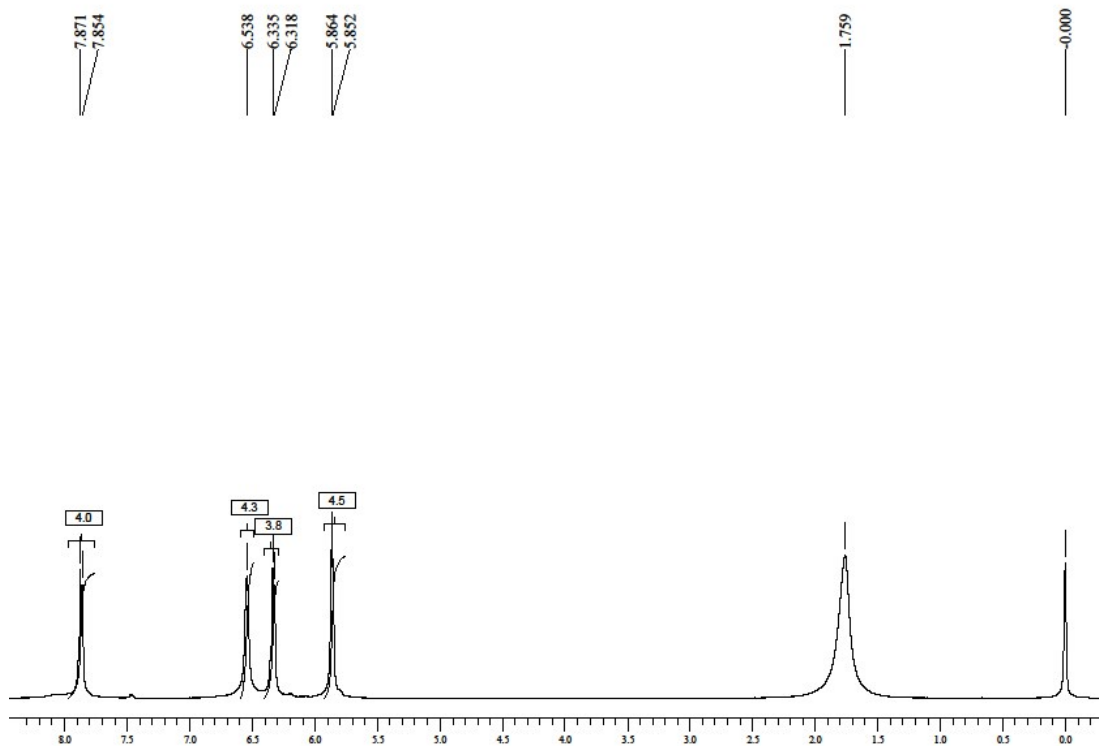

**Fig. S1** <sup>1</sup>H NMR spectrum for compound **1**(PF<sub>6</sub>)<sub>2</sub>·2H<sub>2</sub>O].

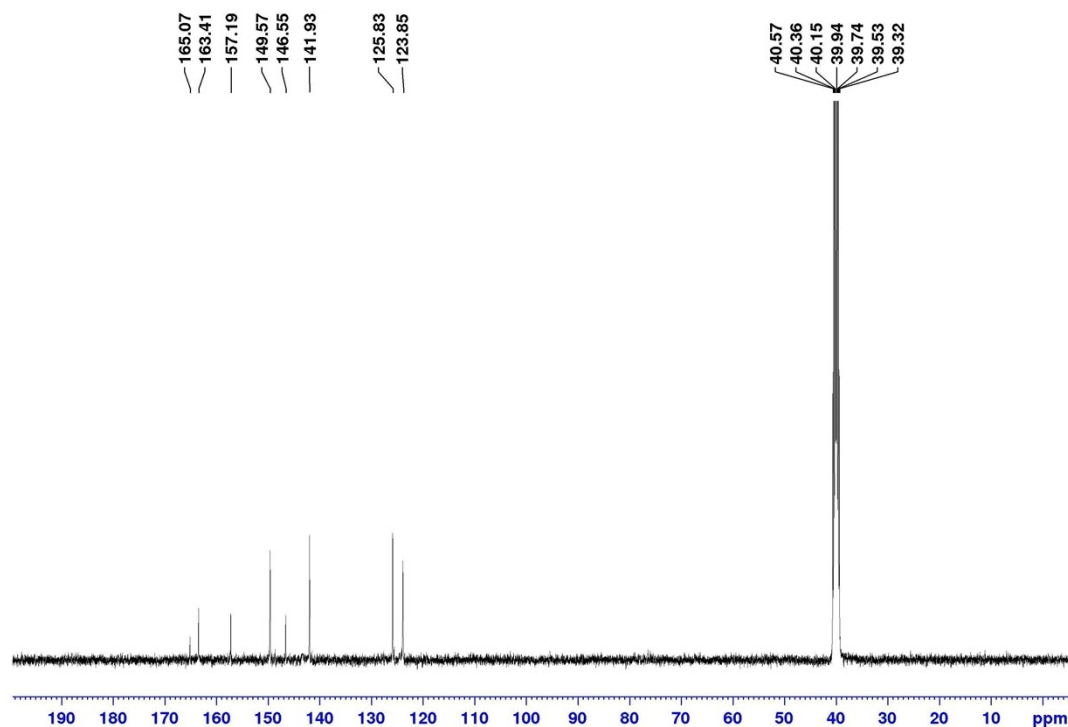

**Fig. S2**  $^{13}\text{C}$  NMR spectrum for compound  $1(\text{PF}_6)_2 \cdot 2\text{H}_2\text{O}$ .

### 3. Single crystal X-ray crystallographic analysis

Crystal data were measured at 100(2) K on a Bruker SMART APEX CCD area detector system [ $\lambda(\text{Mo-K}\alpha) = 0.71073 \text{ \AA}$ ], graphite monochromator; 2400 frames were recorded with an  $\omega$  scan width of  $0.3^\circ$ , each for 8 s, crystal-detector distance 60 mm, collimator 0.5 mm. Data reduction by SAINTPLUS,<sup>[1]</sup> absorption correction using an empirical method SADABS,<sup>[2]</sup> structure solution using SHELXS-97<sup>[3]</sup> and refined using SHELXL-97.<sup>[4]</sup> All non-hydrogen atoms were refined anisotropically. Hydrogen atoms were introduced on calculated positions and included in the refinement riding on their respective parent atoms. A summary of the crystallographic data and structural determination for  $1(\text{PF}_6)_2 \cdot 2\text{H}_2\text{O}$  and  $1 \cdot \text{PF}_6$  are provided in SI Table 1. The complete bond lengths and angles for the compounds  $1(\text{PF}_6)_2 \cdot 2\text{H}_2\text{O}$  and  $1 \cdot \text{PF}_6$  have been provided in SI (Table 2).

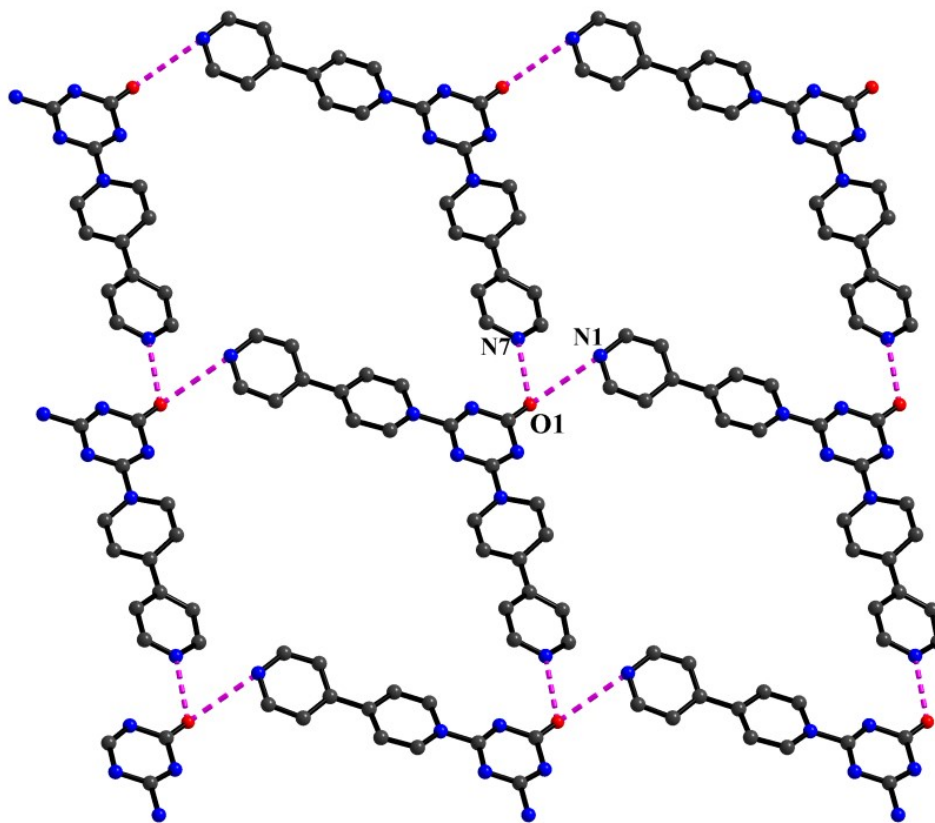

**Fig. S3** Infinite 2D network in the crystal structure of  $1(\text{PF}_6)_2 \cdot 2\text{H}_2\text{O}$ , formed by bifurcated  $\text{N} \cdots \text{O}=\text{C}$  non-covalent interactions. Hydrogen atoms, the counter anions, and the solvents are eliminated for clarity; color code, gray, carbon; blue, nitrogen; red, oxygen.

**Table S1.** Crystal data and structural refinement for compounds **1(PF<sub>6</sub>)<sub>2</sub>·2H<sub>2</sub>O** and **1·PF<sub>6</sub>**

|                                                 | <b>1(PF<sub>6</sub>)<sub>2</sub>·2H<sub>2</sub>O</b>                                         | <b>1·PF<sub>6</sub></b>                                          |
|-------------------------------------------------|----------------------------------------------------------------------------------------------|------------------------------------------------------------------|
| Empirical formula                               | C <sub>23</sub> H <sub>21</sub> F <sub>12</sub> N <sub>7</sub> O <sub>3</sub> P <sub>2</sub> | C <sub>23</sub> H <sub>16</sub> F <sub>6</sub> N <sub>7</sub> OP |
| Formula weight                                  | 728.37                                                                                       | 551.40                                                           |
| T [K]                                           | 100(2)                                                                                       | 100(2)                                                           |
| λ [Å]                                           | 0.71073                                                                                      | 0.71073                                                          |
| Crystal system                                  | Triclinic                                                                                    | Monoclinic                                                       |
| Space group                                     | <i>P</i> $\bar{1}$                                                                           | P2(1)/c                                                          |
| <i>a</i> [Å]                                    | 8.633(4)                                                                                     | 5.036(2)                                                         |
| <i>b</i> [Å]                                    | 12.422(6)                                                                                    | 19.412(9)                                                        |
| <i>c</i> [Å]                                    | 13.653(6)                                                                                    | 23.741(10)                                                       |
| α [deg]                                         | 87.328(8)                                                                                    | 90                                                               |
| β [deg]                                         | 89.110(7)                                                                                    | 87.874(10)                                                       |
| γ [deg]                                         | 79.874(8)                                                                                    | 90                                                               |
| <i>V</i> [Å <sup>3</sup> ]                      | 1439.9(12)                                                                                   | 2319.2(18)                                                       |
| <i>Z</i>                                        | 2                                                                                            | 4                                                                |
| <i>D</i> <sub>calc</sub> [Mg m <sup>-3</sup> ]  | 1.680                                                                                        | 1.579                                                            |
| $\mu$ [mm <sup>-1</sup> ]                       | 0.270                                                                                        | 0.201                                                            |
| F[000]                                          | 730                                                                                          | 1120                                                             |
| Crystal size [mm <sup>3</sup> ]                 | 0.30 x 0.10 x 0.04                                                                           | 0.28 x 0.08 x 0.06                                               |
| θ range for data<br>collection [deg]            | 2.833 to 22.497                                                                              | 1.355 to 25.00                                                   |
| Reflections collected/unique                    | 9540/3377                                                                                    | 14864/4044                                                       |
| R (int)                                         | 0.0972                                                                                       | 0.1317                                                           |
| Refinement method                               | Full-matrix least-squares on F <sup>2</sup>                                                  |                                                                  |
| Data/restraints/parameters                      | 3377 / 0 / 424                                                                               | 4044 / 0 / 343                                                   |
| Goodness-of-fit on F <sup>2</sup>               | 0.989                                                                                        | 0.972                                                            |
| R <sub>1</sub> /wR <sub>2</sub> [I > 2σ(I)]     | 0.0809/0.1874                                                                                | 0.0683/0.1395                                                    |
| R <sub>1</sub> /wR <sub>2</sub> (all data)      | 0.1513/0.2247                                                                                | 0.1620/0.1747                                                    |
| Largest diff. Peak/hole<br>[e Å <sup>-3</sup> ] | 0.450 /-0.302                                                                                | 0.378/-0.321                                                     |

**Table S2.** Selected bond lengths [Å] and angles [°] for compound **1(PF<sub>6</sub>)<sub>2</sub>·2H<sub>2</sub>O**

|                  |           |                   |          |
|------------------|-----------|-------------------|----------|
| N(6)-C(9)        | 1.351(8)  | N(4)-C(11)-N(5)   | 128.8(6) |
| N(6)-C(8)        | 1.386(9)  | N(4)-C(11)-N(6)   | 118.2(6) |
| N(6)-C(11)       | 1.435(9)  | N(5)-C(11)-N(6)   | 113.0(6) |
| N(3)-C(13)       | 1.276(8)  | N(3)-C(13)-N(5)   | 129.5(6) |
| N(3)-C(25)       | 1.414(9)  | N(3)-C(13)-N(2)   | 118.5(6) |
| N(4)-C(11)       | 1.299(8)  | N(5)-C(13)-N(2)   | 112.0(6) |
| N(4)-C(25)       | 1.393(9)  | C(10)-C(9)-N(6)   | 119.8(7) |
| O(1)-C(25)       | 1.188(8)  | C(10)-C(6)-C(7)   | 115.2(7) |
| N(2)-C(14)       | 1.306(10) | C(10)-C(6)-C(5)   | 123.6(7) |
| N(2)-C(15)       | 1.336(9)  | C(15)-C(16)-C(18) | 120.3(7) |
| N(5)-C(13)       | 1.341(9)  | N(6)-C(8)-C(7)    | 118.3(6) |
| C(9)-C(10)       | 1.342(9)  | C(9)-C(10)-C(6)   | 123.6(7) |
| C(6)-C(10)       | 1.401(10) | C(23)-C(19)-C(20) | 116.8(7) |
| C(7)-C(8)        | 1.388(10) | C(23)-C(19)-C(18) | 122.6(7) |
| C(19)-C(20)      | 1.408(10) | C(20)-C(19)-C(18) | 120.5(7) |
| C(19)-C(18)      | 1.508(9)  | C(1)-C(3)-C(5)    | 119.8(7) |
| N(7)-C(1)        | 1.299(9)  | C(16)-C(18)-C(17) | 117.3(7) |
| N(7)-C(2)        | 1.329(9)  | C(16)-C(18)-C(19) | 121.2(6) |
| C(3)-C(1)        | 1.365(11) | C(17)-C(18)-C(19) | 121.5(7) |
| C(3)-C(5)        | 1.386(9)  | C(21)-N(1)-C(22)  | 116.7(7) |
| C(18)-C(17)      | 1.381(10) | N(2)-C(15)-C(16)  | 122.2(7) |
| N(1)-C(22)       | 1.331(12) | C(2)-C(4)-C(5)    | 122.4(7) |
| C(5)-C(4)        | 1.400(10) | N(2)-C(14)-C(17)  | 122.1(8) |
| C(9)-N(6)-C(8)   | 121.2(6)  | N(7)-C(1)-C(3)    | 122.2(7) |
| C(8)-N(6)-C(11)  | 117.6(6)  | N(7)-C(2)-C(4)    | 119.1(8) |
| C(14)-N(2)-C(15) | 118.8(6)  | N(1)-C(21)-C(20)  | 124.4(8) |
| C(14)-N(2)-C(13) | 121.8(6)  | O(1)-C(25)-N(4)   | 121.8(6) |
| C(15)-N(2)-C(13) | 119.4(6)  | O(1)-C(25)-N(3)   | 121.2(6) |
| C(13)-N(5)-C(11) | 109.9(6)  | N(4)-C(25)-N(3)   | 116.9(7) |

**Table S3.** Selected bond lengths [Å] and angles [°] for compound **1**PF<sub>6</sub>

---

|                   |          |                   |          |
|-------------------|----------|-------------------|----------|
| N(4)-C(4)         | 1.344(5) | C(21)-C(23)       | 1.362(7) |
| N(4)-C(2)         | 1.466(5) | N(4)-C(5)         | 1.353(5) |
| N(6)-C(14)        | 1.326(5) | N(2)-C(2)         | 1.284(5) |
| N(6)-C(3)         | 1.458(5) | O(1)-C(1)         | 1.224(4) |
| N(3)-C(2)         | 1.326(5) | N(6)-C(15)        | 1.329(5) |
| N(1)-C(1)         | 1.398(5) | N(3)-C(3)         | 1.319(5) |
| C(7)-C(8)         | 1.386(5) | N(1)-C(3)         | 1.290(5) |
| C(8)-C(9)         | 1.471(6) | C(7)-C(4)         | 1.368(6) |
| C(9)-C(10)        | 1.366(7) | C(8)-C(6)         | 1.392(6) |
| N(7)-C(22)        | 1.305(7) | N(7)-C(23)        | 1.316(6) |
| C(22)-C(20)       | 1.377(7) | N(5)-C(12)        | 1.319(7) |
| N(5)-C(13)        | 1.326(6) | C(13)-C(10)       | 1.379(7) |
|                   |          |                   |          |
| C(4)-N(4)-C(5)    | 120.1(4) | C(3)-N(1)-C(1)    | 115.0(4) |
| C(14)-N(6)-C(3)   | 120.7(3) | N(2)-C(2)-N(4)    | 116.3(4) |
| C(3)-N(3)-C(2)    | 109.7(3) | N(4)-C(5)-C(6)    | 120.4(4) |
| N(2)-C(2)-N(3)    | 131.0(4) | C(10)-C(9)-C(8)   | 122.2(4) |
| N(3)-C(2)-N(4)    | 112.7(3) | C(16)-C(17)-C(18) | 116.4(4) |
| N(1)-C(3)-N(3)    | 130.5(4) | C(18)-C(17)-C(19) | 122.0(4) |
| N(3)-C(3)-N(6)    | 112.5(3) | N(1)-C(3)-N(6)    | 116.9(4) |
| O(1)-C(1)-N(2)    | 120.7(4) | O(1)-C(1)-N(1)    | 120.1(4) |
| C(5)-C(6)-C(8)    | 121.5(4) | N(1)-C(1)-N(2)    | 119.2(3) |
| C(15)-C(16)-C(17) | 120.6(4) | N(4)-C(4)-C(7)    | 120.5(4) |
| N(6)-C(14)-C(18)  | 121.0(4) | C(12)-C(11)-C(9)  | 119.4(5) |
| C(20)-C(19)-C(21) | 115.7(4) | N(6)-C(15)-C(16)  | 121.1(4) |
| C(21)-C(19)-C(17) | 122.1(4) | C(22)-N(7)-C(23)  | 114.9(5) |
| N(7)-C(22)-C(2)   | 125.0(5) | C(14)-C(18)-C(17) | 120.8(4) |
| C(12)-N(5)-C(13)  | 115.5(5) | C(19)-C(20)-C(22) | 119.7(5) |
| N(5)-C(12)-C(11)  | 124.7(5) | N(5)-C(13)-C(10)  | 123.9(6) |
| C(15)-N(6)-C(3)   | 119.2(3) | C(9)-C(10)-C(13)  | 120.2(5) |

---



#### 4. Computational Details:

The geometry optimizations of the molecules have been carried out using the DFT, M062X Minnesota functionals with DZVP basis set. Gaussian-09 program package is used for this purpose. The nature of the stationary points was verified by calculation of the vibrational frequencies.

#### Coordinates of the optimized geometry of $1^{2+}$ :

##### Standard orientation:

| Center<br>Number | Atomic<br>Number | Atomic<br>Type | Coordinates (Angstroms) |           |           |
|------------------|------------------|----------------|-------------------------|-----------|-----------|
|                  |                  |                | X                       | Y         | Z         |
| 1                | 15               | 0              | 0.000181                | -3.619587 | 0.190508  |
| 2                | 9                | 0              | 1.161195                | -2.479387 | -0.180442 |
| 3                | 9                | 0              | 1.164828                | -4.661688 | 0.597613  |
| 4                | 9                | 0              | -1.161116               | -2.479598 | -0.180198 |
| 5                | 9                | 0              | -1.164180               | -4.661909 | 0.597852  |
| 6                | 9                | 0              | 0.000286                | -3.012899 | 1.740422  |
| 7                | 9                | 0              | 0.000070                | -4.118964 | -1.342335 |
| 8                | 15               | 0              | -0.000191               | 3.663223  | 0.911224  |
| 9                | 9                | 0              | 1.152861                | 2.614851  | 1.491767  |
| 10               | 9                | 0              | -0.000194               | 4.465970  | 2.300993  |
| 11               | 9                | 0              | -1.163529               | 4.590282  | 0.285371  |
| 12               | 9                | 0              | -0.000110               | 2.749521  | -0.513250 |
| 13               | 9                | 0              | 1.163114                | 4.590334  | 0.285421  |
| 14               | 9                | 0              | -1.153135               | 2.614702  | 1.491767  |
| 15               | 7                | 0              | 2.344298                | -0.072126 | 0.659014  |
| 16               | 7                | 0              | -1.206327               | -0.540128 | 2.649892  |
| 17               | 7                | 0              | 1.206332                | -0.540088 | 2.649909  |
| 18               | 8                | 0              | -0.000003               | -0.994935 | 4.514477  |
| 19               | 7                | 0              | -2.344287               | -0.072196 | 0.658984  |
| 20               | 7                | 0              | 0.000005                | 0.032479  | 0.700833  |
| 21               | 6                | 0              | 1.108926                | -0.194129 | 1.400365  |
| 22               | 6                | 0              | -1.108920               | -0.194157 | 1.400352  |
| 23               | 6                | 0              | 2.432191                | 0.803684  | -0.372309 |
| 24               | 1                | 0              | 1.562599                | 1.417154  | -0.565988 |
| 25               | 6                | 0              | 4.700107                | 0.077202  | -0.776364 |
| 26               | 6                | 0              | 4.555575                | -0.824101 | 0.292293  |
| 27               | 1                | 0              | 5.365561                | -1.476304 | 0.587406  |

|    |   |   |           |           |           |
|----|---|---|-----------|-----------|-----------|
| 28 | 6 | 0 | -4.555561 | -0.824214 | 0.292303  |
| 29 | 1 | 0 | -5.365539 | -1.476412 | 0.587453  |
| 30 | 6 | 0 | 3.377199  | -0.885448 | 0.993016  |
| 31 | 1 | 0 | 3.198837  | -1.558395 | 1.817870  |
| 32 | 6 | 0 | 3.603040  | 0.893215  | -1.089380 |
| 33 | 1 | 0 | 3.645500  | 1.596816  | -1.909007 |
| 34 | 6 | 0 | -5.960211 | 0.158416  | -1.542222 |
| 35 | 7 | 0 | 8.359977  | 0.314284  | -2.994815 |
| 36 | 6 | 0 | 6.717181  | -0.986744 | -1.815512 |
| 37 | 1 | 0 | 6.385374  | -1.968856 | -1.501129 |
| 38 | 6 | 0 | -4.700111 | 0.077041  | -0.776392 |
| 39 | 7 | 0 | -8.360006 | 0.314017  | -2.994811 |
| 40 | 6 | 0 | 5.960200  | 0.158616  | -1.542204 |
| 41 | 6 | 0 | -3.603051 | 0.893045  | -1.089451 |
| 42 | 1 | 0 | -3.645521 | 1.596609  | -1.909108 |
| 43 | 6 | 0 | -3.377182 | -0.885514 | 0.993024  |
| 44 | 1 | 0 | -3.198813 | -1.558417 | 1.817911  |
| 45 | 6 | 0 | 6.439446  | 1.384037  | -2.019986 |
| 46 | 1 | 0 | 5.914206  | 2.310211  | -1.820342 |
| 47 | 6 | 0 | -2.432198 | 0.803564  | -0.372381 |
| 48 | 1 | 0 | -1.562622 | 1.417043  | -0.566115 |
| 49 | 6 | 0 | 7.894717  | -0.854110 | -2.545459 |
| 50 | 1 | 0 | 8.490610  | -1.730552 | -2.781287 |
| 51 | 6 | 0 | -6.439464 | 1.383815  | -2.020056 |
| 52 | 1 | 0 | -5.914222 | 2.309999  | -1.820460 |
| 53 | 6 | 0 | -6.717196 | -0.986956 | -1.815468 |
| 54 | 1 | 0 | -6.385387 | -1.969054 | -1.501042 |
| 55 | 6 | 0 | 7.637798  | 1.405478  | -2.727623 |
| 56 | 1 | 0 | 8.036159  | 2.346289  | -3.095085 |
| 57 | 6 | 0 | -7.637823 | 1.405223  | -2.727680 |
| 58 | 1 | 0 | -8.036189 | 2.346018  | -3.095181 |
| 59 | 6 | 0 | -7.894742 | -0.854356 | -2.545406 |
| 60 | 1 | 0 | -8.490638 | -1.730809 | -2.781185 |
| 61 | 6 | 0 | 0.000001  | -0.707110 | 3.309144  |

---

**Coordinates of the optimized radical cation (2<sup>+</sup>) in the doublet state:**

**Standard orientation:**

| Center<br>Number | Atomic<br>Number | Atomic<br>Type | Coordinates (Angstroms) |           |           |
|------------------|------------------|----------------|-------------------------|-----------|-----------|
|                  |                  |                | X                       | Y         | Z         |
| 1                | 15               | 0              | -0.000049               | 2.253241  | -0.000112 |
| 2                | 9                | 0              | -0.527752               | 1.040271  | 1.005691  |
| 3                | 9                | 0              | 0.527647                | 1.040223  | -1.005861 |
| 4                | 9                | 0              | 0.549449                | 3.347364  | -1.019075 |
| 5                | 9                | 0              | -0.549540               | 3.347412  | 1.018805  |
| 6                | 9                | 0              | 1.441561                | 2.197409  | 0.769849  |
| 7                | 9                | 0              | -1.441655               | 2.197384  | -0.770078 |
| 8                | 7                | 0              | -2.337806               | -1.772767 | -0.060695 |
| 9                | 7                | 0              | -1.196173               | -3.825046 | -0.006655 |
| 10               | 8                | 0              | 0.000047                | -5.753077 | -0.000109 |
| 11               | 7                | 0              | 2.337824                | -1.772729 | 0.060657  |
| 12               | 7                | 0              | 0.000008                | -1.787160 | -0.000018 |
| 13               | 7                | 0              | 1.196227                | -3.825024 | 0.006589  |
| 14               | 6                | 0              | -1.111658               | -2.510722 | -0.017414 |
| 15               | 6                | 0              | -4.660780               | -1.650669 | 0.381556  |
| 16               | 1                | 0              | -5.553034               | -2.125976 | 0.772938  |
| 17               | 6                | 0              | -4.682863               | -0.310513 | -0.064155 |
| 18               | 6                | 0              | -2.322118               | -0.489110 | -0.518247 |
| 19               | 1                | 0              | -1.370227               | -0.099987 | -0.864551 |
| 20               | 6                | 0              | -5.919180               | 0.486900  | -0.027317 |
| 21               | 6                | 0              | 4.682881                | -0.310473 | 0.064227  |
| 22               | 6                | 0              | 1.111687                | -2.510701 | 0.017371  |
| 23               | 6                | 0              | 0.000033                | -4.462707 | -0.000004 |
| 24               | 6                | 0              | -3.484224               | 0.245827  | -0.532758 |
| 25               | 1                | 0              | -3.427192               | 1.257099  | -0.917060 |
| 26               | 6                | 0              | -3.492546               | -2.362835 | 0.372375  |
| 27               | 1                | 0              | -3.407671               | -3.387933 | 0.711601  |
| 28               | 6                | 0              | 3.484209                | 0.245884  | 0.532727  |
| 29               | 1                | 0              | 3.427149                | 1.257167  | 0.916998  |
| 30               | 6                | 0              | -5.863308               | 1.866570  | 0.198718  |
| 31               | 1                | 0              | -4.922928               | 2.379270  | 0.378041  |
| 32               | 6                | 0              | 3.492590                | -2.362807 | -0.372328 |
| 33               | 1                | 0              | 3.407740                | -3.387916 | -0.711525 |

|    |   |   |           |           |           |
|----|---|---|-----------|-----------|-----------|
| 34 | 6 | 0 | 2.322106  | -0.489055 | 0.518160  |
| 35 | 1 | 0 | 1.370186  | -0.099913 | 0.864361  |
| 36 | 6 | 0 | 5.919206  | 0.486931  | 0.027462  |
| 37 | 7 | 0 | 8.258464  | 2.021699  | -0.055344 |
| 38 | 6 | 0 | 8.303961  | 0.706757  | 0.168901  |
| 39 | 1 | 0 | 9.290752  | 0.278950  | 0.323815  |
| 40 | 6 | 0 | 4.660824  | -1.650639 | -0.381455 |
| 41 | 1 | 0 | 5.553104  | -2.125957 | -0.772766 |
| 42 | 7 | 0 | -8.258417 | 2.021691  | 0.055637  |
| 43 | 6 | 0 | 7.173085  | -0.106317 | 0.210721  |
| 44 | 1 | 0 | 7.281394  | -1.165599 | 0.423000  |
| 45 | 6 | 0 | -7.060188 | 2.580201  | 0.238518  |
| 46 | 1 | 0 | -7.051277 | 3.650231  | 0.427058  |
| 47 | 6 | 0 | -8.303943 | 0.706747  | -0.168586 |
| 48 | 1 | 0 | -9.290749 | 0.278947  | -0.323421 |
| 49 | 6 | 0 | 5.863364  | 1.866598  | -0.198598 |
| 50 | 1 | 0 | 4.923003  | 2.379305  | -0.377998 |
| 51 | 6 | 0 | -7.173078 | -0.106339 | -0.210475 |
| 52 | 1 | 0 | -7.281413 | -1.165624 | -0.422729 |
| 53 | 6 | 0 | 7.060254  | 2.580217  | -0.238320 |
| 54 | 1 | 0 | 7.051366  | 3.650244  | -0.426877 |

---

## 5. References

1. Software for the CCD Detector System; Bruker Analytical X-Ray Systems Inc.: Madison, WI, 1998.
2. Sheldrick, G. M. SADABS, A Program for Absorption Correction with the Siemens SMART Area-Detector System; University of Göttingen: Germany, 1996.
3. Sheldrick, G. M. SHELXS-97, A Program for Solution of Crystal Structures; University of Göttingen: Germany, 1997.
4. Sheldrick, G. M. SHELXL-97, A Program for Refinement of Crystal Structures; University of Göttingen: Germany, 1997.
